# Supplementary material for: Toxicity profile of antibody-drug conjugates in breast cancer: practical considerations
Source: PubMed Central journal article supplement — eClinicalMedicine. 2023 Jul 27;62:102113. doi: 10.1016/j.eclinm.2023.102113 (PMC10404866; doi:10.1016/j.eclinm.2023.102113), 2023-07-27
Supplement: mmc1.pdf [file mmc1.pdf]

| Name of the compound              | Target | Linker                         | Payload                          | (DAR) |
|-----------------------------------|--------|--------------------------------|----------------------------------|-------|
| Trastuzumab emtasine (T-DM1)      | HER2   | MCC (non-cleavable)            | DM1 (microtubule inhibitor)      | 3.5   |
| Trastuzumab deruxtecan (T-DXd)    | HER2   | GGFG (cleavable)               | DXd (topoisomerase I inhibitor)  | 8     |
| Trastuzumab duocarmazine (SYD985) | HER2   | VC (cleavable)                 | Duocarmycin (alkylating agent)   | 2.8   |
| Sacituzumab govitecan (SG)        | Trop2  | Carbonate (cleavable)          | SN38 (topoisomerase I inhibitor) | 7.6   |
| Datopotamab deruxtecan (Dato-DXd) | Trop2  | Tetrapeptide-based (cleavable) | DXd (topoisomerase I inhibitor)  | 4     |
| Patritumab deruxtecan (HER3-DXd)  | HER3   | Tetrapeptide-based (cleavable) | DXd (topoisomerase inhibitorI)   | 6     |

Table S1. ADCs structures. DAR, Drug-to-antibody ratio; GGFG, Gly-Gly-Phe-Gly; MCC, maleimidomethyl cyclohexane-1-carboxylate; VC, valine-citrulline.

| Drugs           | Most common grade 3 -4 AEs %                      | Start / End AE                                                                                                                                                        | Monitoring blood sample                                                                                                                                                                                                                                                                                                  |
|-----------------|---------------------------------------------------|-----------------------------------------------------------------------------------------------------------------------------------------------------------------------|--------------------------------------------------------------------------------------------------------------------------------------------------------------------------------------------------------------------------------------------------------------------------------------------------------------------------|
| <b>T-DM1</b>    | Thrombocytopenia (45.1%)                          | Nadir day 8<br>Resolution at the next schedule dose                                                                                                                   | Routine blood test is recommended regularly before the first treatment, on the first day of each treatment cycle and at 30 days after drug administration.                                                                                                                                                               |
| <b>T-DXd</b>    | Neutropenia (16%)<br>Febrile neutropenia (1.1%)   | The median time to onset was 54 days (range: 1 day to 18.0 months) and the median duration median first event was 22 days (range: 2 days to 9.0 months)               | Monitor complete blood counts prior to initiation and prior to each dose, and as clinically indicated.                                                                                                                                                                                                                   |
| <b>SG</b>       | Neutropenia (49.5%)<br>Febrile neutropenic (6.6%) | The median time to the onset of neutropenia after the start of the first course of treatment was 15 days.<br>The median duration of neutropenia was 8 days            | Monitor blood cell counts periodically during treatment<br>Indication for the count neutrophil<br>Sacituzumab govitecan should not be administered if the absolute neutrophil count is below 1,500/mm <sup>3</sup> on day 1 of any cycle or if the neutrophil count is below 1,000/mm <sup>3</sup> on day 8 of any cycle |
| <b>Dato-DXd</b> | Anemia (4%)                                       | Not reported                                                                                                                                                          | Not reported                                                                                                                                                                                                                                                                                                             |
| <b>Her3-DXd</b> | Neutropenia (39.6%),<br>Trombocytopenia (30.8%)   | The median time to first onset was 8 days for thrombocytopenia and 12 days for neutropenia; the median duration was 8 days for both thrombocytopenia and neutropenia. | Not reported                                                                                                                                                                                                                                                                                                             |

Table S2. Common hematological AEs reported during treatment with ADCs, time of onset and monitoring blood test.

| CTCAE v.6.0 GRADE | ANEMIA                                                               | PLATELET COUNT DECREASE                                              | NEUTROPHIL COUNT                                               |
|-------------------|----------------------------------------------------------------------|----------------------------------------------------------------------|----------------------------------------------------------------|
| 1                 | Hemoglobin (Hgb) <LLN - 10.0 g/dL; <LLN - 6.2 mmol/L; <LLN - 100 g/L | <LLN - 75,000/mm <sup>3</sup> ; <LLN - 75.0 x 10 <sup>9</sup> /L     | <LLN - 1500/mm <sup>3</sup> ; <LLN - 1.5 x 10 <sup>9</sup> /L  |
| 2                 | Hgb <10.0 - 8.0 g/dL; <6.2 - 4.9 mmol/L; <100 - 80g/L                | <75,000 - 50,000/mm <sup>3</sup> ; <75.0 - 50.0 x 10 <sup>9</sup> /L | <1500 - 1000/mm <sup>3</sup> ; <1.5 - 1.0 x 10 <sup>9</sup> /L |
| 3                 | Hgb <8.0 g/dL; <4.9 mmol/L; <80 g/L;                                 | <50,000 - 25,000/mm <sup>3</sup> ; <50.0 - 25.0 x 10 <sup>9</sup> /L | <1000 - 500/mm <sup>3</sup> ; <1.0 - 0.5 x 10 <sup>9</sup> /L  |
| 4                 | Life-threatening consequences; urgent intervention indicated         | <25,000/mm <sup>3</sup> ; <25.0 x 10 <sup>9</sup> /L                 | <500/mm <sup>3</sup> ; <0.5 x 10 <sup>9</sup> /L               |

Table S3. Hematological toxicities grading according to CTCAE. LLN=lower limit of normal.

| Dose reductions                                        |                                                                                                                  |
|--------------------------------------------------------|------------------------------------------------------------------------------------------------------------------|
| T-DM1<br>Starting dose: 3.6 mg/kg q3w                  | First level reduction: 3 mg/kg q3 w<br>Second level reduction :2.4 mg/kg q3w<br>Further reduction: Discontinue   |
| T-DXd<br>Starting dose: 5.4 mg/kg q3w                  | First level reduction: 4.4 mg/kg q3 w<br>Second level reduction :3.2 mg/kg q3w<br>Further reduction: Discontinue |
| SG<br>Starting dose: 10 mg/Kg day 1;day 8 q3w          | First level reduction: 25%<br>Second level reduction :50%<br>Further reduction: Discontinue                      |
| Dato-DXd<br>Starting dose: 6 mg/kg q3w                 | Not reported                                                                                                     |
| Her3-DXd<br>Starting dose: 4.8 mg/kg and 6.4 mg/kg q3w | Not reported                                                                                                     |

Table S4. Dose modification of ADCs.

|                           |             |                                                                                                                                                                                                                                                    |
|---------------------------|-------------|----------------------------------------------------------------------------------------------------------------------------------------------------------------------------------------------------------------------------------------------------|
| <b>Symptomatic CTRCD</b>  | Very severe | HF requiring inotropic support, mechanical circulatory support, or consideration of transplantation                                                                                                                                                |
|                           | Severe      | HF hospitalization                                                                                                                                                                                                                                 |
|                           | Moderate    | Need for outpatient intensification of diuretic and HF therapy                                                                                                                                                                                     |
|                           | Mild        | no intensification of therapy required                                                                                                                                                                                                             |
| <b>Asymptomatic CTRCD</b> | Severe      | New LVEF reduction to <40%                                                                                                                                                                                                                         |
|                           | Moderate    | New LVEF reduction by $\geq 10$ percentage points to an LVEF of 40–49%<br><br>New LVEF reduction by < 10 percentage points to an LVEF of 40–49% AND either new relative decline in GLS by >15% from baseline<br><br>New rise in cardiac biomarkers |
|                           | Mild        | LVEF $\geq 50\%$<br><br>AND new relative decline in GLS by <15% from baseline<br><br>AND/OR new rise in cardiac biomarkers                                                                                                                         |

Table S5. Cancer therapy related cardiac dysfunction (CTRCD) according to the European Society of Cardiology (ESC).

| <b>Clinical condition</b>   | <b>Management</b>                                                                                 | <b>Causing Agent</b>     |
|-----------------------------|---------------------------------------------------------------------------------------------------|--------------------------|
| Dry eye                     | Topical lubricants                                                                                | T-DM1<br>SYD985<br>T-DXd |
| Conjunctivitis              | Topical lubricants<br>Topical antibiotics<br>Topical steroids<br>Delay or stop the administration | T-DM1<br>SYD985          |
| Keratitis                   | Topical lubricants<br>Topical steroids (if ulcerative)<br>Delay or stop the administration        | T-DM1<br>SYD985          |
| Cataract                    | Surgery                                                                                           | T-DM1                    |
| Tear duct stenosis/swelling | Topical diuretics and steroids<br>Dacryocystostomy                                                | T-DM1                    |

Table S6. Management of ADCs-related eye disorders.

|       | <b>Trial</b>         | <b>Investigational arm</b>                        | <b>Control arm</b>                                                                |
|-------|----------------------|---------------------------------------------------|-----------------------------------------------------------------------------------|
| T-DM1 | TH3RESA [1]          | 2%                                                | 11%                                                                               |
|       | MARIANNE [2]         | 6.6% (T-DM1 alone)<br><br>9% (T-DM1 + pertuzumab) | 59,8% (trastuzumab + taxane)                                                      |
|       | I-SPY [3]            | 9.6% (T-DM1 + pertuzumab)                         | 66.7% (paclitaxel + trastuzumab + pertuzumab)<br>67.7% (paclitaxel + trastuzumab) |
|       | AEMPT [4]            | 0.3%                                              | 41% (paclitaxel + trastuzumab)                                                    |
| T-DXd | DESTINY-Breast01 [5] | 49.8%                                             | N/A                                                                               |
|       | DESTINY-Breast03 [6] | 36.2%                                             | 2.3% (grade 1; T-DM1)                                                             |

|          |                                       |               |                      |
|----------|---------------------------------------|---------------|----------------------|
|          | DESTINY-Breast04 [7]                  | 37.7%         | 32.6% (chemotherapy) |
| SG       | ASCENT [8]                            | 47%           | 16% (chemotherapy)   |
|          | IMMU-132-01 [9]                       | 38%           | N/A                  |
| SYD985   | NCT02277717 [10]                      | 21% (grade 1) | N/A                  |
|          |                                       | 18% (grade 2) |                      |
| Dato-DXd | TROPION-PanTumor01 (BC subgroup) [11] | 35%           | N/A                  |
| HER3-DXd | U31402-A-U102 [12]                    | 30-32%        | N/A                  |

Table S7. Incidence of alopecia during treatment with ADCs across trials. NA=Not applicable

|        | Trial            | Investigational arm                     | Control arm                                                                     |
|--------|------------------|-----------------------------------------|---------------------------------------------------------------------------------|
| T-DM1  | TH3RESA [1]      | 6% (1 case grade 3)                     | 10%                                                                             |
|        | I-SPY [3]        | 15.4% (T-DM1 + pertuzumab)              | 33% (paclitaxel + trastuzumab + pertuzumab)<br>25.8% (paclitaxel + trastuzumab) |
|        | EMILIA [13]      | 11.6%                                   | 27.5% (capecitabine + lapatinib)                                                |
| SG     | ASCENT [8]       | 12% (1 case grade 3)                    | 5% (chemotherapy)                                                               |
|        | IMMU-132-01 [9]  | 30% (2% grade 3)                        | N/A                                                                             |
| SYD985 | NCT02277717 [10] | 3% (grade $\leq$ 2)<br>1 case (grade 3) | N/A                                                                             |

Table S8. Incidence of cutaneous rash during treatment with ADCs across trials. NA=Not applicable

| Compound                                          | Year of the first PubMed publication | DLT in Phase I                           | Main toxicities in Phase II clinical trials          | Year of the last fully published clinical trial. |
|---------------------------------------------------|--------------------------------------|------------------------------------------|------------------------------------------------------|--------------------------------------------------|
| Myatansin (parent compound of emtansine)          | 1972 [14]                            | Fatigue, Nausea, Vomiting, Diarrhea [15] | Vomiting, Diarrhea, Lethargy, altered mentation [16] | 1985 [17], Phase II                              |
| Exatecan Mesylate (parent compound of deruxtecan) | 1995 [18]                            | Neutropenia [19]                         | Neutropenia, fatigue, nausea diarrhea [20]           | 2007 [21], Phase II*                             |
| Dolastatin (parent compound of vedotin)           | 1980 [22]                            | Neutropenia [23]                         | Neutropenia [24]                                     | 2009 [25], Phase I                               |
| Duocarmycin (parent compound of duocarmazine)     | 1980 [26]                            | Leukopenia, neutropenia and              | Leukopenia, neutropenia,                             | 2007 [29], Phase II                              |

|  |  |                       |                               |  |
|--|--|-----------------------|-------------------------------|--|
|  |  | thrombocytopenia [27] | thrombocytopenia, anemia [28] |  |
|--|--|-----------------------|-------------------------------|--|

Table S9. Summary of selected prior investigations of intravenous formulations of currently available ADCs' payloads parent compounds. \*Results of a phase III showing no advantage of adding intravenous exatecan to gemcitabine in advanced pancreatic cancer were published in 2006 [30].

## Post-marketing pharmacovigilance reports

A pharmacovigilance study based on the FDA Adverse Event Reporting System (FAERS) database described post-marketing AEs incidence with T-DM1 and T-DXd. Most reported AEs occurring during T-DM1 treatment were thrombocytopenia, hepatic toxicity (ranging from liver enzymes alteration to hepatic cirrhosis, portal hypertension, and nodular regenerative hyperplasia), and peripheral neuropathy, while nausea, ILD/pneumonia and fatigue were the most frequently reported toxicity with T-DXd [31].

We further searched through the European Union Drug Regulating Authorities Pharmacovigilance (EudraVigilance) database, where 3686 cases of toxicity associated to T-DM1 administration were reported post-marketing, 192 related to cardiac disorders (whose 186 described as severe). A total of 1597 cases of toxicity were registered with T-DXd, 40 (2.5%) reported as cardiotoxicity. Whereas, 15 cases of cardiac disorders out of a total of 773 post-marketing toxicities were reported with the use of SG [32]. According to the same database [32], GI disorders represented the 21.5% and 27% of the suspected adverse reaction with T-DXd and SG, respectively. For these drugs, GI toxicity represents the third most common reported AE. Regarding T-DM1, GI disorders are on seventh place in the 15.7% of reporting. Nausea and vomiting are respectively the 61.2% and 25.2% of GI disorders reported with T-DXd treatment, in particular the 13.3% and 5.4% of all suspected AE. Nausea is the 27% of suspected GI disorders related to SG treatment and the 7.3% of total reports, while vomiting is the 9.4% of GI and 2.5% of whole reports. Nausea accounts to 29.4% of GI disorders reported with T-DM1 treatment (4.6% of total reports) while vomiting represents the 16% (2.5% of total reports). Diarrhea represents the 66% of the GI disorders reported for SG (17.8% of total reports), the 25.2% for T-DM1 and 17.5% for T-DXd (about 4% of total reports for both drugs). Stomatitis represents <1% of AEs reported with T-DM1, T-DXd and SG. Laboratory alterations are the second most common AE reported in patients treated with T-DM1 (22.1%). AST and ALT increase are respectively 8.3% and 7.6% of these alterations reported. Overall, alterations of liver enzymes (reported as "hepatic enzymes increased", "liver function test abnormal", "transaminase elevation", etc.) are about 42% of these reports and about 12% of all T-DM1 suspected AE reports. Moreover, there are 53 reports of NRH in patients treated with T-DM1, none of them was fatal. Only 1 case of NRH is reported in this database regarding patients treated with T-DXd. To date, no cases are reported with SG. Hepatobiliary disorders are reported in 12.1% of patients treated with T-DM1, 3.6% for T-DXd and 1.4% for SG. At the last update of the post-marketing analysis (April 2023) led by EudraVigilance, the cases of ILD reported in the toxicity group respiratory, thoracic, and mediastinal disorders were 619 related to T-DM1, 563 cases related to T-DXd, and 49 cases related to SG. Four patients treated with SG reported eye disorders (dry eye, blurred vision, ulcerative keratitis, eyelid disorders and visual impairment, the latter registered as "fatal"). Less than 1.5% (19 patients) of the AEs reported during T-DXd treatment were referred as eye disorders (of note, among the others, blindness, cataract, eye hematoma, punctate keratitis, uveitis, corneal epithelial microcysts, and pinguecula were described). Different ocular AEs are described as occurred in 126 patients treated with T-DM1 in the same database. Finally, regarding embryo-fetal toxicity, in the post-marketing setting, oligohydramnios, sometimes associated with pulmonary hypoplasia, has been reported in pregnant women treated with trastuzumab[32].

## References

- [1] Krop IE, Kim S-B, Martin AG, LoRusso PM, Ferrero J-M, Badovinac-Crnjevic T, et al. Trastuzumab emtansine versus treatment of physician's choice in patients with previously treated HER2-positive metastatic breast cancer (TH3RESA): final overall survival results from a randomised open-label phase 3 trial. *Lancet Oncol* 2017;18:743–54. [https://doi.org/10.1016/S1470-2045\(17\)30313-3](https://doi.org/10.1016/S1470-2045(17)30313-3).

- [2] Perez EA, Barrios C, Eiermann W, Toi M, Im YH, Conte P, et al. Trastuzumab emtansine with or without pertuzumab versus trastuzumab plus taxane for human epidermal growth factor receptor 2-positive, advanced breast cancer: Primary results from the phase III MARIANNE study. *J Clin Oncol* 2017;35:141–8. <https://doi.org/10.1200/JCO.2016.67.4887>.
- [3] Clark AS, Yau C, Wolf DM, Petricoin EF, van 't Veer LJ, Yee D, et al. Neoadjuvant T-DM1/pertuzumab and paclitaxel/trastuzumab/pertuzumab for HER2+ breast cancer in the adaptively randomized I-SPY2 trial. *Nat Commun* 2021;12:6428. <https://doi.org/10.1038/s41467-021-26019-y>.
- [4] Tolaney SM, Tayob N, Dang C, Yardley DA, Isakoff SJ, Valero V, et al. Adjuvant Trastuzumab Emtansine Versus Paclitaxel in Combination With Trastuzumab for Stage I HER2-Positive Breast Cancer (ATEMPT): A Randomized Clinical Trial. *J Clin Oncol* 2021;39:2375–85. <https://doi.org/10.1200/JCO.20.03398>.
- [5] Modi S, Saura C, Yamashita T, Park YH, Kim S-B, Tamura K, et al. Trastuzumab Deruxtecan in Previously Treated HER2-Positive Breast Cancer. *N Engl J Med* 2020;382:610–21. <https://doi.org/10.1056/NEJMoa1914510>.
- [6] Cortés J, Kim S-B, Chung W-P, Im S-A, Park YH, Hegg R, et al. Trastuzumab Deruxtecan versus Trastuzumab Emtansine for Breast Cancer. *N Engl J Med* 2022;386:1143–54.
- [7] Modi S, Jacot W, Yamashita T, Sohn J, Vidal M, Tokunaga E, et al. Trastuzumab Deruxtecan in Previously Treated HER2-Low Advanced Breast Cancer. *N Engl J Med* 2022;387:9–20.
- [8] Bardia A, Hurvitz SA, Tolaney SM, Loirat D, Punie K, Oliveira M, et al. Sacituzumab Govitecan in Metastatic Triple-Negative Breast Cancer. *N Engl J Med* 2021;384:1529–41.
- [9] Bardia A, Mayer IA, Vahdat LT, Tolaney SM, Isakoff SJ, Diamond JR, et al. Sacituzumab Govitecan-hziy in Refractory Metastatic Triple-Negative Breast Cancer. *N Engl J Med* 2019;380:741–51. <https://doi.org/10.1056/NEJMoa1814213>.
- [10] Banerji U, van Herpen CMLL, Saura C, Thistlethwaite F, Lord S, Moreno V, et al. Trastuzumab duocarmazine in locally advanced and metastatic solid tumours and HER2-expressing breast cancer: a phase 1 dose-escalation and dose-expansion study. *Lancet Oncol* 2019;20:1124–35. [https://doi.org/10.1016/S1470-2045\(19\)30328-6](https://doi.org/10.1016/S1470-2045(19)30328-6).
- [11] Krop I, Juric D, Shimizu T, Tolcher A, Spira A, Mukohara T, et al. Abstract GS1-05: Datopotamab deruxtecan in advanced/metastatic HER2- breast cancer: Results from the phase 1 TROPION-PanTumor01 study. *Cancer Res* 2022;82:GS1-05-GS1-05. <https://doi.org/10.1158/1538-7445.SABCS21-GS1-05>.
- [12] Jänne PA, Baik C, Su WC, Johnson ML, Hayashi H, Nishio M, et al. Efficacy and Safety of Patritumab Deruxtecan (HER3-DXd) in EGFR Inhibitor– Resistant, EGFR-Mutated Non–Small Cell Lung Cancer. *Cancer Discov* 2022;12:74–89. <https://doi.org/10.1158/2159-8290.CD-21-0715>.
- [13] Verma S, Miles D, Gianni L, Krop IE, Welslau M, Baselga J, et al. Trastuzumab Emtansine for HER2-Positive Advanced Breast Cancer. *N Engl J Med* 2012;367:1783–91. <https://doi.org/10.1056/NEJMoa1209124>.
- [14] Kupchan SM, Komoda Y, Court WA, Thomas GJ, Smith RM, Karim A, et al. Maytansine, a novel antileukemic ansa macrolide from *Maytenus ovatus*. *J Am Chem Soc* 1972;94:1354–6. <https://doi.org/10.1021/ja00759a054>.
- [15] Blum RH, Kahlert T. Maytansine: a phase I study of an ansa macrolide with antitumor activity. *Cancer Treat Rep* 1978;62:435–8.
- [16] Neidhart JA, Laufman LR, Vaughn C, McCracken JD. Minimal single-agent activity of maytansine in refractory breast cancer: a Southwest Oncology Group study. *Cancer Treat Rep* 1980;64:675–7.
- [17] Ravry MJ, Omura GA, Birch R. Phase II evaluation of maytansine (NSC 153858) in advanced cancer. A Southeastern Cancer Study Group trial. *Am J Clin Oncol* 1985;8:148–50. <https://doi.org/10.1097/00000421-198504000-00007>.
- [18] Mitsui I, Kumazawa E, Hirota Y, Aonuma M, Sugimori M, Ohsuki S, et al. A New Water-soluble Camptothecin Derivative, DX-8951f, Exhibits Potent Antitumor Activity against Human Tumors in vitro and in vivo. *Japanese J Cancer Res* 1995;86:776–82. <https://doi.org/10.1111/J.1349-7006.1995.TB02468.X>.
- [19] Boige V, Raymond E, Faivre S, Gateau M, Meely K, Mekhaldi S, et al. Phase I and pharmacokinetic study of the camptothecin analog DX-8951f administered as a 30-minute infusion every 3 weeks in patients with advanced cancer. *J Clin Oncol Off J Am Soc Clin Oncol* 2000;18:3986–92. <https://doi.org/10.1200/JCO.2000.18.23.3986>.

- [20] Royce ME, Rowinsky EK, Hoff PM, Coyle J, DeJager R, Pazdur R, et al. A phase II study of intravenous exatecan mesylate (DX-8951f) administered daily for five days every three weeks to patients with metastatic adenocarcinoma of the colon or rectum. *Invest New Drugs* 2004;22:53–61. <https://doi.org/10.1023/b:drug.0000006174.87869.6b>.
- [21] Reichardt P, Nielsen OS, Bauer S, Hartmann JT, Schöffski P, Christensen TB, et al. Exatecan in pretreated adult patients with advanced soft tissue sarcoma: results of a phase II--study of the EORTC Soft Tissue and Bone Sarcoma Group. *Eur J Cancer* 2007;43:1017–22. <https://doi.org/10.1016/j.ejca.2007.01.014>.
- [22] Bai R, Pettit GR, Hamel E. Dolastatin 10, a powerful cytostatic peptide derived from a marine animal. Inhibition of tubulin polymerization mediated through the vinca alkaloid binding domain. *Biochem Pharmacol* 1990;39:1941–9. [https://doi.org/10.1016/0006-2952\(90\)90613-p](https://doi.org/10.1016/0006-2952(90)90613-p).
- [23] Madden T, Tran HT, Beck D, Huie R, Newman RA, Puzstai L, et al. Novel marine-derived anticancer agents: a phase I clinical, pharmacological, and pharmacodynamic study of dolastatin 10 (NSC 376128) in patients with advanced solid tumors. *Clin Cancer Res an Off J Am Assoc Cancer Res* 2000;6:1293–301.
- [24] Perez EA, Hillman DW, Fishkin PA, Krook JE, Tan WW, Kuriakose PA, et al. Phase II trial of dolastatin-10 in patients with advanced breast cancer. *Invest New Drugs* 2005;23:257–61. <https://doi.org/10.1007/s10637-005-6735-y>.
- [25] Yamamoto N, Andoh M, Kawahara M, Fukuoka M, Niitani H. Phase I study of TZT-1027, a novel synthetic dolastatin 10 derivative and inhibitor of tubulin polymerization, given weekly to advanced solid tumor patients for 3 weeks. *Cancer Sci* 2009;100:316–21. <https://doi.org/10.1111/j.1349-7006.2008.01023.x>.
- [26] Martin DG, Chidester CG, Duchamp DJ, Mizesak SA. Structure of CC-1065 (NSC-298223), a new antitumor antibiotic. *J Antibiot (Tokyo)* 1980;33:902–3. <https://doi.org/10.7164/antibiotics.33.902>.
- [27] Alberts SR, Erlichman C, Reid JM, Sloan JA, Ames MM, Richardson RL, et al. Phase I study of the duocarmycin semisynthetic derivative KW-2189 given daily for five days every six weeks. *Clin Cancer Res an Off J Am Assoc Cancer Res* 1998;4:2111–7.
- [28] Pavlidis N, Aamdal S, Awada A, Calvert H, Fumoleau P, Sorio R, et al. Carzelesin phase II study in advanced breast, ovarian, colorectal, gastric, head and neck cancer, non-Hodgkin's lymphoma and malignant melanoma: a study of the EORTC early clinical studies group (ECSG). *Cancer Chemother Pharmacol* 2000;46:167–71. <https://doi.org/10.1007/s002800000134>.
- [29] Alberts SR, Suman VJ, Pitot HC, Camoriano JK, Rubin J. Use of KW-2189, a DNA minor groove-binding agent, in patients with hepatocellular carcinoma: a north central cancer treatment group (NCCTG) phase II clinical trial. *J Gastrointest Cancer* 2007;38:10–4. <https://doi.org/10.1007/s12029-007-9007-6>.
- [30] Abou-Alfa GK, Letourneau R, Harker G, Modiano M, Hurwitz H, Tchekmedyian NS, et al. Randomized phase III study of exatecan and gemcitabine compared with gemcitabine alone in untreated advanced pancreatic cancer. *J Clin Oncol Off J Am Soc Clin Oncol* 2006;24:4441–7. <https://doi.org/10.1200/JCO.2006.07.0201>.
- [31] Ma P, Tian H, Shi Q, Liu R, Zhang Y, Qi X, et al. High risks adverse events associated with trastuzumab emtansine and trastuzumab deruxtecan for the treatment of HER2-positive/mutated malignancies: a pharmacovigilance study based on the FAERS database. *Expert Opin Drug Saf* 2023. <https://doi.org/10.1080/14740338.2023.2204228>.
- [32] EudraVigilance - European database of suspected adverse drug reaction reports n.d. <https://www.adrreports.eu/en/search.html#>.
